# Supplementary material for: Oligosaccharides Derived from Red Seaweed: Production, Properties, and Potential Health and Cosmetic Applications
Source: PubMed Central journal article supplement (PMC6222765; doi:10.3390/molecules23102451), 2018-09-25
Supplement: molecules-23-02451-s001.pdf [file molecules-23-02451-s001.pdf]

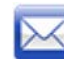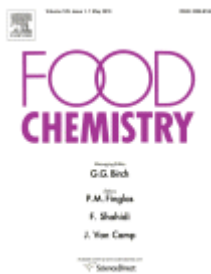

**Title:** Preparation of bioactive neogargaroligosaccharides through hydrolysis of Gracilaria lemaneiformis agar: A comparative study

**Author:** Xin-Qi Xu, Bing-Mei Su, Jin-Sheng Xie, Ren-Kuan Li, Jie Yang, Juan Lin, Xiu-Yun Ye

**Publication:** Food Chemistry

**Publisher:** Elsevier

**Date:** 1 February 2018

© 2017 Elsevier Ltd. All rights reserved.

Logged in as:  
Kit Leong Cheong  
Shantou University

LOGOUT

### Custom Permission Request

**Review the details below and click 'Submit Request'.  
Elsevier will review and respond within 15 business days.**

|                                                 |                                                                                                                             |
|-------------------------------------------------|-----------------------------------------------------------------------------------------------------------------------------|
| Licensed Content Publisher                      | Elsevier                                                                                                                    |
| Licensed Content Publication                    | Food Chemistry                                                                                                              |
| Licensed Content Title                          | Preparation of bioactive neogargaroligosaccharides through hydrolysis of Gracilaria lemaneiformis agar: A comparative study |
| Licensed Content Author                         | Xin-Qi Xu, Bing-Mei Su, Jin-Sheng Xie, Ren-Kuan Li, Jie Yang, Juan Lin, Xiu-Yun Ye                                          |
| Licensed Content Date                           | 1 February 2018                                                                                                             |
| Licensed Content Volume                         | 240                                                                                                                         |
| Licensed Content Issue                          | n/a                                                                                                                         |
| Licensed Content Pages                          | 8                                                                                                                           |
| Type of Use                                     | reuse in a journal/magazine                                                                                                 |
| Requestor type                                  | medical educational                                                                                                         |
| Portion                                         | figures/tables/illustrations                                                                                                |
| Number of figures/tables/illustrations          | 1                                                                                                                           |
| Circulation                                     | 1                                                                                                                           |
| Format                                          | electronic                                                                                                                  |
| Are you the author of this Elsevier article?    | Yes                                                                                                                         |
| Will you be translating?                        | No                                                                                                                          |
| Original figure numbers                         | Figure 3                                                                                                                    |
| Title of the article                            | Oligosaccharides Derived from Red Seaweed: Production, Properties, and Potential Health and Cosmetic Applications           |
| Publication new article is in                   | Molecules                                                                                                                   |
| Publisher of the new article                    | MDPI                                                                                                                        |
| Author of new article                           | Kit-Leong Cheong, Hua-Mai Qiu, Hong Du, Yang Liu and Bilal Muhammad Khan                                                    |
| Expected publication date                       | Sep 2018                                                                                                                    |
| Estimated size of new article (number of pages) | 18                                                                                                                          |

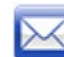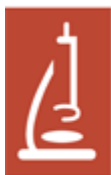

**AMERICAN  
SOCIETY FOR  
MICROBIOLOGY**

**Title:** A Novel Agarolytic  $\beta$ -Galactosidase Acts on Agarooligosaccharides for Complete Hydrolysis of Agarose into Monomers

**Author:** Chan Hyoung Lee, Hee Taek Kim, Eun Ju Yun, Ah Reum Lee, Sa Rang Kim, Jae-Han Kim, In-Geol Choi, Kyoung Heon Kim

**Publication:** Applied and Environmental Microbiology

**Publisher:** American Society for Microbiology

**Date:** Sep 9, 2014

Copyright © 2014, American Society for Microbiology

Logged in as:  
Kit Leong Cheong  
Shantou University

[LOGOUT](#)

## Order Completed

Thank you for your order.

This Agreement between Shantou University -- Kit Leong Cheong ("You") and American Society for Microbiology ("American Society for Microbiology") consists of your license details and the terms and conditions provided by American Society for Microbiology and Copyright Clearance Center.

Your confirmation email will contain your order number for future reference.

### [printable details](#)

|                              |                                                                                                                          |
|------------------------------|--------------------------------------------------------------------------------------------------------------------------|
| License Number               | 4434131305171                                                                                                            |
| License date                 | Sep 22, 2018                                                                                                             |
| Licensed Content Publisher   | American Society for Microbiology                                                                                        |
| Licensed Content Publication | Applied and Environmental Microbiology                                                                                   |
| Licensed Content Title       | A Novel Agarolytic $\beta$ -Galactosidase Acts on Agarooligosaccharides for Complete Hydrolysis of Agarose into Monomers |
| Licensed Content Author      | Chan Hyoung Lee, Hee Taek Kim, Eun Ju Yun, Ah Reum Lee, Sa Rang Kim, Jae-Han Kim, In-Geol Choi, Kyoung Heon Kim          |
| Licensed Content Date        | Sep 9, 2014                                                                                                              |
| Licensed Content Volume      | 80                                                                                                                       |
| Licensed Content Issue       | 19                                                                                                                       |
| Licensed Content Pages       | 9                                                                                                                        |
| Type of Use                  | Journal                                                                                                                  |
| Requestor type               | Non-profit                                                                                                               |
| Format                       | Electronic                                                                                                               |
| Portion                      | Figures/tables/images                                                                                                    |
| Number of figures/tables     | 1                                                                                                                        |
| Will you be translating?     | No                                                                                                                       |

|                                          |                                                                                                                                        |
|------------------------------------------|----------------------------------------------------------------------------------------------------------------------------------------|
| Author of this ASM article               | No                                                                                                                                     |
| Order reference number                   |                                                                                                                                        |
| Title of new article                     | Oligosaccharides Derived from Red Seaweed: Production, Properties, and Potential Health and Cosmetic Applications                      |
| Publication the new article is in        | Molecules                                                                                                                              |
| Publisher of new article                 | MDPI                                                                                                                                   |
| Author of new article                    | Kit-Leong Cheong, Hua-Mai Qiu, Hong Du, Yang Liu and Bilal Muhammad Khan                                                               |
| Expected publication date of new article | Sep 2018                                                                                                                               |
| Estimated size of new article (pages)    | 18                                                                                                                                     |
| Requestor Location                       | Shantou University<br>Guangdong Province, Shantou City                                                                                 |
|                                          | Shantou, Guangdong 515063<br>China<br>Attn: Shantou University                                                                         |
| Publisher Tax ID                         | 38-1616141                                                                                                                             |
| Billing Type                             | Invoice                                                                                                                                |
| Billing address                          | Shantou University<br>243 Da Xue Road,<br>Shantou, Guangdong 515063<br>P.R. China<br>Shantou, China 515063<br>Attn: Shantou University |
| Total                                    | 5.00 USD                                                                                                                               |

[ORDER MORE](#)

[CLOSE WINDOW](#)

Copyright © 2018 [Copyright Clearance Center, Inc.](#) All Rights Reserved. [Privacy statement.](#) [Terms and Conditions.](#)

Comments? We would like to hear from you. E-mail us at [customercare@copyright.com](mailto:customercare@copyright.com)

Requestor Location Shantou University  
Guangdong Province, Shantou City

Shantou, Guangdong 515063  
China  
Attn: Shantou University

Publisher Tax ID GB 494 6272 12

Total Not Available

Edit Order Details

Edit Requestor Location This location may be used to determine your tax liability.

**BACK      SUBMIT REQUEST**

Copyright © 2018 [Copyright Clearance Center, Inc.](#) All Rights Reserved. [Privacy statement](#). [Terms and Conditions](#).

Comments? We would like to hear from you. E-mail us at [customercare@copyright.com](mailto:customercare@copyright.com)

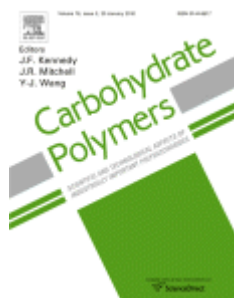

**Title:** Carrageenans: Biological properties, chemical modifications and structural analysis – A review

**Author:** Vanessa Leiria Campo, Daniel Fábio Kawano, Dílson Braz da Silva, Ivone Carvalho

**Publication:** Carbohydrate Polymers

**Publisher:** Elsevier

**Date:** 10 June 2009

Copyright © 2009 Elsevier Ltd. All rights reserved.

Logged in as:  
Kit Leong Cheong  
Shantou University

LOGOUT

### Custom Permission Request

**Review the details below and click 'Submit Request'.  
Elsevier will review and respond within 15 business days.**

|                                                 |                                                                                                                   |
|-------------------------------------------------|-------------------------------------------------------------------------------------------------------------------|
| Licensed Content Publisher                      | Elsevier                                                                                                          |
| Licensed Content Publication                    | Carbohydrate Polymers                                                                                             |
| Licensed Content Title                          | Carrageenans: Biological properties, chemical modifications and structural analysis – A review                    |
| Licensed Content Author                         | Vanessa Leiria Campo, Daniel Fábio Kawano, Dílson Braz da Silva, Ivone Carvalho                                   |
| Licensed Content Date                           | 10 June 2009                                                                                                      |
| Licensed Content Volume                         | 77                                                                                                                |
| Licensed Content Issue                          | 2                                                                                                                 |
| Licensed Content Pages                          | 14                                                                                                                |
| Type of Use                                     | reuse in a journal/magazine                                                                                       |
| Requestor type                                  | medical educational                                                                                               |
| Portion                                         | figures/tables/illustrations                                                                                      |
| Number of figures/tables/illustrations          | 3                                                                                                                 |
| Circulation                                     | 1                                                                                                                 |
| Format                                          | electronic                                                                                                        |
| Are you the author of this Elsevier article?    | Yes                                                                                                               |
| Will you be translating?                        | No                                                                                                                |
| Original figure numbers                         | figure 12, figure 13, and figure 14                                                                               |
| Title of the article                            | Oligosaccharides Derived from Red Seaweed: Production, Properties, and Potential Health and Cosmetic Applications |
| Publication new article is in                   | Molecules                                                                                                         |
| Publisher of the new article                    | MDPI                                                                                                              |
| Author of new article                           | Kit-Leong Cheong, Hua-Mai Qiu, Hong Du, Yang Liu and Bilal Muhammad Khan                                          |
| Expected publication date                       | Sep 2018                                                                                                          |
| Estimated size of new article (number of pages) | 18                                                                                                                |

Requestor Location Shantou University  
Guangdong Province, Shantou City

Shantou, Guangdong 515063  
China  
Attn: Shantou University

Publisher Tax ID GB 494 6272 12

Total Not Available

Edit Order Details

Edit Requestor Location This location may be used to determine your tax liability.

**BACK      SUBMIT REQUEST**

Copyright © 2018 [Copyright Clearance Center, Inc.](#) All Rights Reserved. [Privacy statement](#), [Terms and Conditions](#).

Comments? We would like to hear from you. E-mail us at [customercare@copyright.com](mailto:customercare@copyright.com)
